# Supplementary material for: An Innovative Digestion Method: Ultrasound-Assisted Electrochemical Oxidation for the Onsite Extraction of Heavy Metal Elements in Dairy Farm Slurry
Source: MDPI journal article supplement (doi:10.3390/ma14164562), 2021-08-13
Supplement: s1 [file s1]

**Table S1.** Operating program of microwave apparatus.

| Step | Temperature (°C) | Hold Time (min) | Pressure Limit (atm) |
|------|------------------|-----------------|----------------------|
| 1    | 80               | 5               | 5                    |
| 2    | 120              | 5               | 20                   |
| 3    | 180              | 20              | 30                   |

**Table S2.** ICP-OES instrumental parameters for the analysis of 10 objective HMs.

| Parameter           | Value      | Parameter          | Value                  |
|---------------------|------------|--------------------|------------------------|
| Clean pump speed    | 50 rpm     | Nebulizer gas flow | 0.50 L/min             |
| Analysis pump speed | 50 rpm     | Calibration type   | Zero intercept, linear |
| RF power            | 1150 W     | Replicates         | 3                      |
| Plasma gas flow     | 12 L/min   | Carrier solution   | 1% HNO <sub>3</sub>    |
| Auxiliary gas flow  | 0.50 L/min | Rinse solution     | 5% HNO <sub>3</sub>    |
